# Supplementary material
Source: Springer Nature journal article supplement (https://www.springermedizin.de/resource/supplementary/12891_2014_2176_MOESM2_ESM.pdf/9509622)

Pain (Knee)

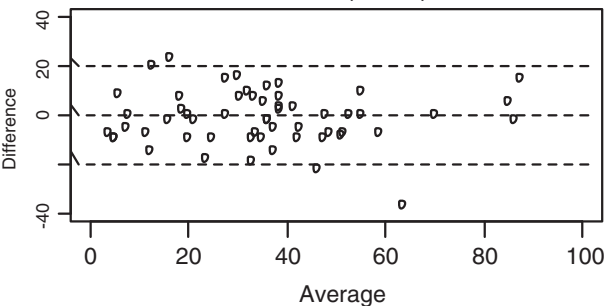

Pain (Hip)

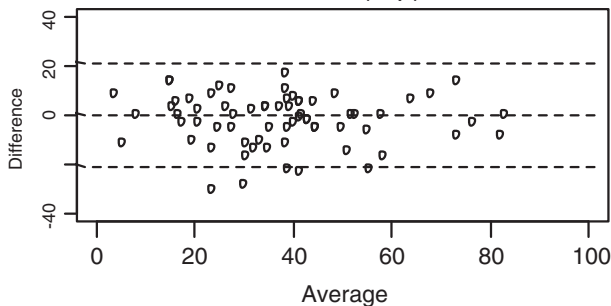

Symptoms (Knee)

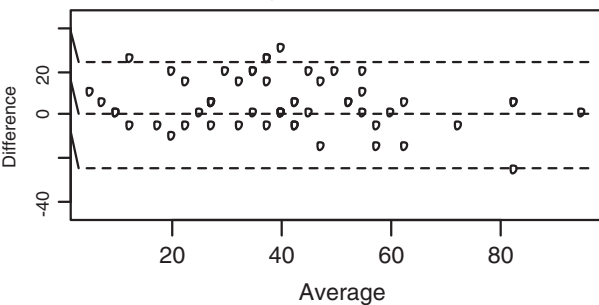

Symptoms (Hip)

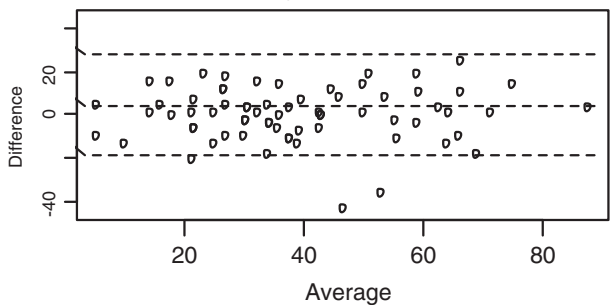

ADL (Knee)

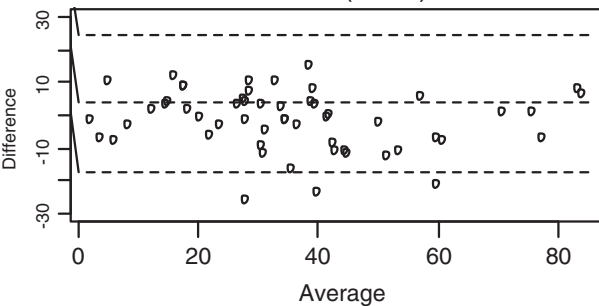

ADL (Hip)

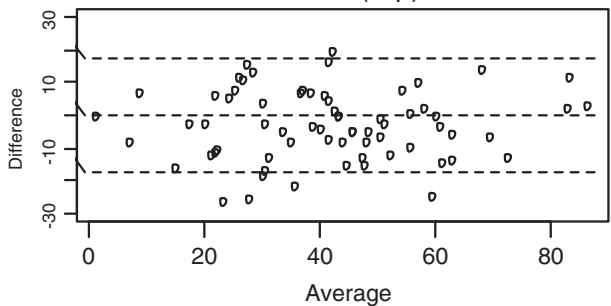

QoL (Knee)

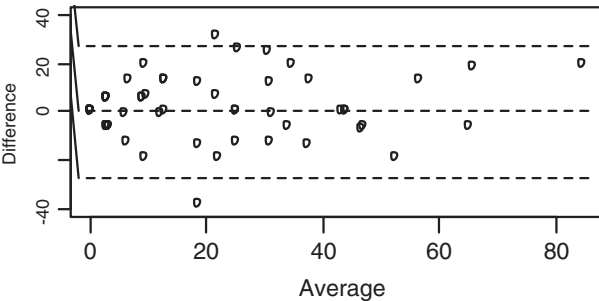

QoL (Hip)

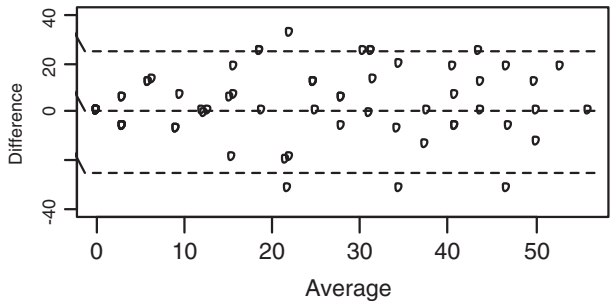

Supplement: MOESM2 [file 9509622]
